# Supplementary material for: Highly crystalline Zn2SnO4 nanoparticles as efficient electron-transporting layers toward stable inverted and flexible conventional perovskite solar cells
Source: Royal Society of Chemistry journal article supplement (doi:10.1039/c6ta05745d), 2016-01-01
Supplement: c6ta05745d1.pdf [file c6ta05745d1.pdf]

## Supporting Information

### Highly Crystalline Zn<sub>2</sub>SnO<sub>4</sub> Nanoparticles as Efficient Electron-Transporting Layers toward Stable Inverted and Flexible Conventional Perovskite Solar Cells

Xiao Liu<sup>1,2</sup>, Chu-Chen Chueh<sup>1</sup>, Zonglong Zhu<sup>1</sup>, Sae Byeok Jo<sup>1</sup>, Ye Sun<sup>2</sup> and Alex K.-Y. Jen<sup>1,3\*</sup>

X. Liu, Dr. C.-C. Chueh, Dr. Z. Zhu, Dr. S. B. Jo, and Prof. A. K.-Y. Jen

<sup>1</sup>Department of Materials Science and Engineering, University of Washington, Seattle, WA, 98195-2120, USA

X. Liu and Prof. Y. Sun

<sup>2</sup>Condensed Matter Science and Technology Institute, School of Science, Harbin Institute of Technology, Harbin 150080, China

Prof. A. K.-Y. Jen

<sup>3</sup>Department of Chemistry, University of Washington, Seattle, WA, 98195-2120, USA

\*Address correspondence to: [ajen@u.washington.edu](mailto:ajen@u.washington.edu)

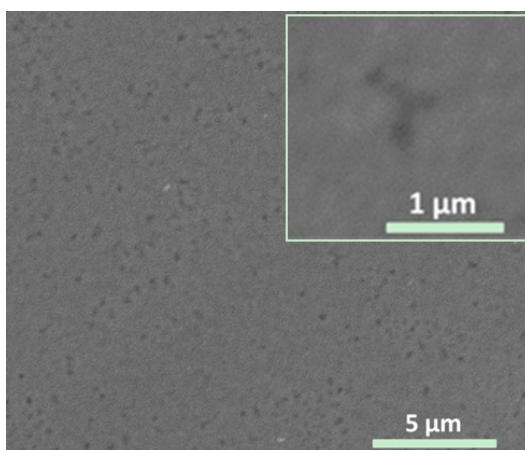

**Figure S1.** SEM image of ZSO film deposited on PCBM, which was processed from a precursor solution with a low concentration of 5 mg/mL in IPA.

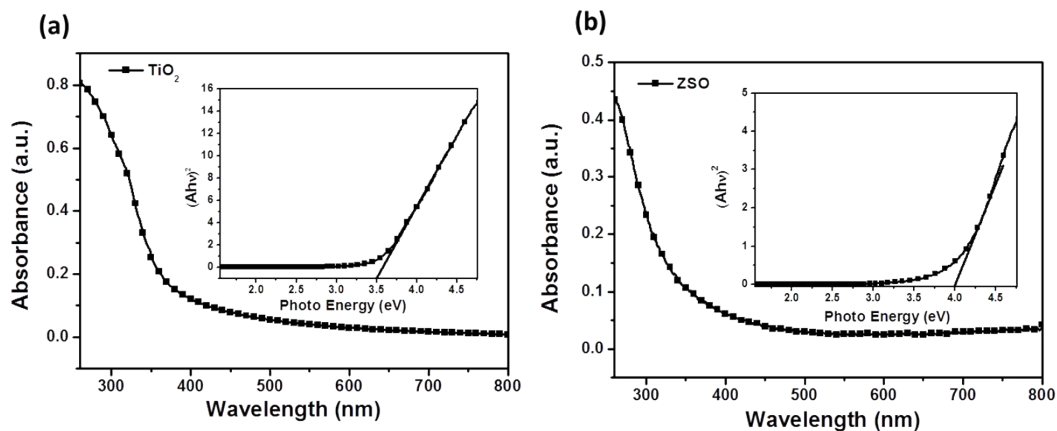

**Figure S2.** UV-Vis absorption and (inset) Kubelka-Munk-transformed diffuse reflectance spectrum of (a)  $\text{TiO}_2$  and (b) ZSO films on quartz.

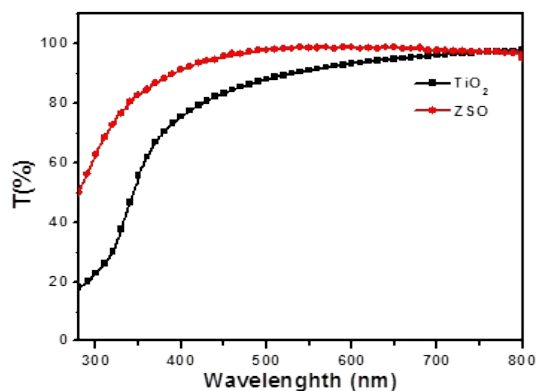

**Figure S3.** Transmittance of ZSO and  $\text{TiO}_2$  films on quartz.

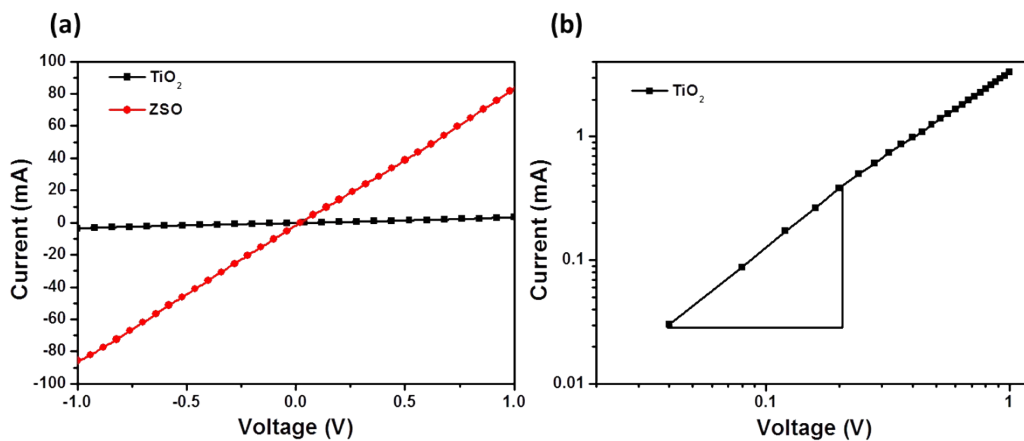

**Figure S4.** I-V curves of ITO/ZSO/Ag and FTO/ $\text{TiO}_2$ /Ag devices.

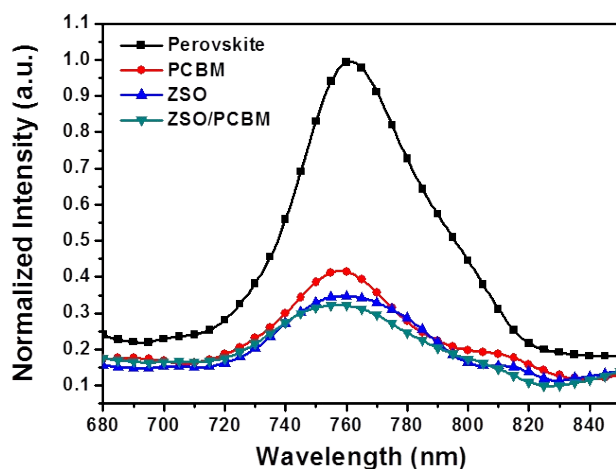

**Figure S5.** PL spectra of perovskite film and its bilayered film comprising PCBM, ZSO, and ZSO/PCBM ETLs

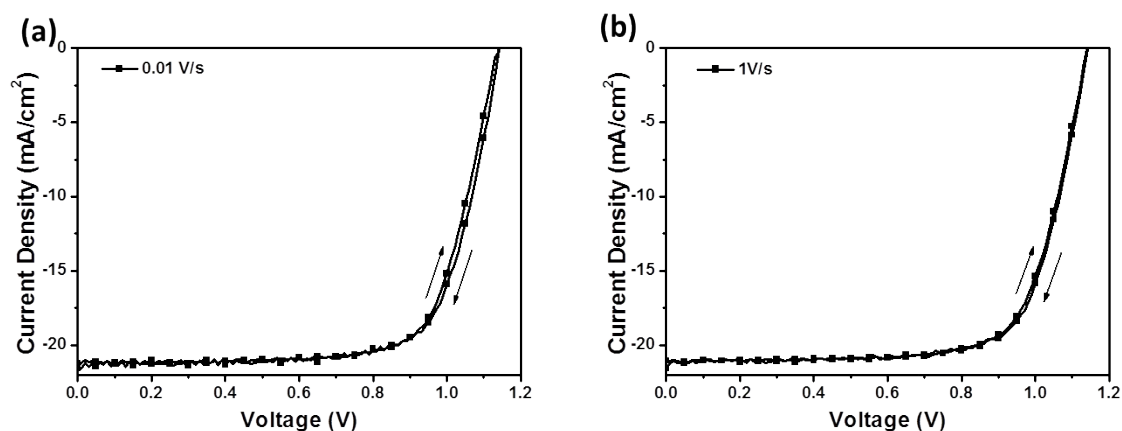

**Figure S6.** The photovoltaic performance of the inverted PVSC measured by different scan rates (a) 0.01 V/s and (b) 1 V/s under forward and reverse scans.

**Table S1.** Photovoltaic parameters of the inverted PVSCs measured by different scan rates under forward and reverse scans.

| Scan Rate | Scan direction | $V_{oc}$ (V)    | $J_{SC}$ (mA/cm <sup>2</sup> ) | FF (%)         | PCE (%)          | PCE <sub>AVG</sub> (%) |
|-----------|----------------|-----------------|--------------------------------|----------------|------------------|------------------------|
| 0.01 V/s  | Forward        | $1.15 \pm 0.01$ | $21.54 \pm 0.27$               | $71.2 \pm 0.4$ | $17.64 \pm 0.47$ | 17.71                  |
|           | Reverse        | $1.15 \pm 0.01$ | $21.24 \pm 0.21$               | $72.8 \pm 0.4$ | $17.78 \pm 0.44$ |                        |
| 1 V/s     | Forward        | $1.15 \pm 0.01$ | $21.49 \pm 0.43$               | $70.6 \pm 0.5$ | $17.46 \pm 0.63$ | 17.61                  |
|           | Reverse        | $1.15 \pm 0.01$ | $21.10 \pm 0.29$               | $73.2 \pm 0.7$ | $17.75 \pm 0.58$ |                        |

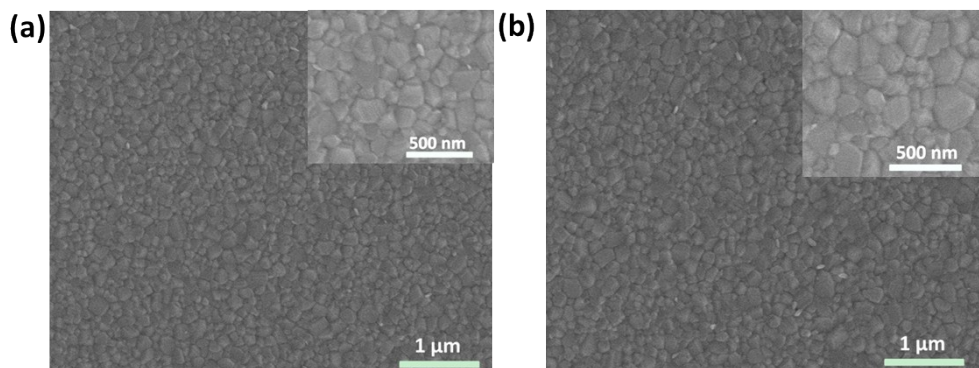

**Figure S7.** SEM images of perovskite film grown on (a) TiO<sub>2</sub>/PCBM and (b)ZSO/PCBM. Insets are the high magnification images.

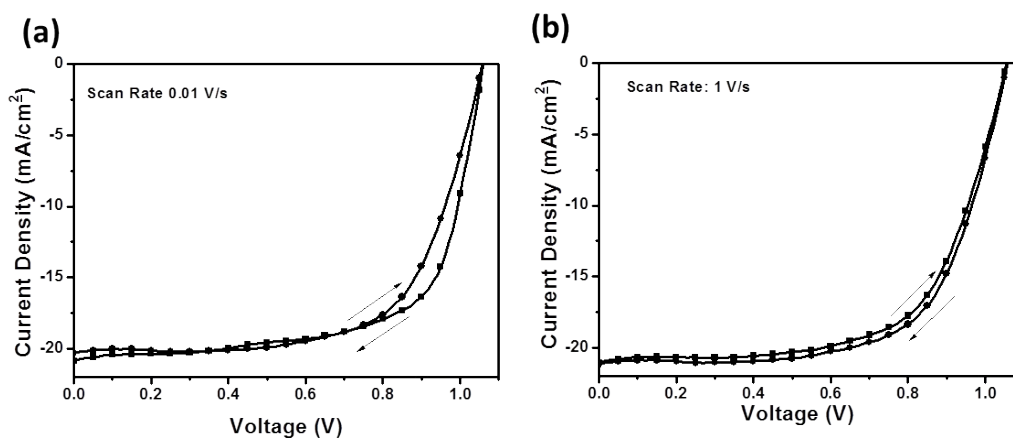

**Figure S8.** The photovoltaic performance of the conventional PVSC measured at different scan rates (a) 0.01 V/s and (b) 1V/s under forward and reverse scans.

**Table S2.** Photovoltaic parameters of the conventional PVSCs measured by different scan rate under forward and reverse scans.

| Scan Rate | Scan direction | $V_{oc}$ (V)    | $J_{sc}$ (mA/cm <sup>2</sup> ) | FF (%)          | PCE (%)          | PCE <sub>AVG</sub> (%) |
|-----------|----------------|-----------------|--------------------------------|-----------------|------------------|------------------------|
| 0.01 V/s  | Forward        | $1.06 \pm 0.01$ | $20.33 \pm 0.45$               | $65.5 \pm 0.61$ | $14.13 \pm 0.57$ | 14.48                  |
|           | Reverse        | $1.07 \pm 0.01$ | $20.86 \pm 0.30$               | $66.5 \pm 0.60$ | $14.83 \pm 0.48$ |                        |
| 1 V/s     | Forward        | $1.06 \pm 0.01$ | $21.15 \pm 0.30$               | $63.6 \pm 0.45$ | $14.27 \pm 0.44$ | 14.49                  |
|           | Reverse        | $1.06 \pm 0.01$ | $21.19 \pm 0.28$               | $65.5 \pm 0.40$ | $14.72 \pm 0.43$ |                        |

**Table S3.** Photovoltaic parameters of the flexible conventional PVSC using ZSO/PCBM ETL.

| Flexible substrate | Scan direction | $V_{oc}$ (V)    | $J_{sc}$ (mA/cm <sup>2</sup> ) | FF (%)          | PCE (%)          | PCE <sub>AVG</sub> (%) |
|--------------------|----------------|-----------------|--------------------------------|-----------------|------------------|------------------------|
| PET/ITO            | Forward        | $1.03 \pm 0.01$ | $17.83 \pm 0.38$               | $61.3 \pm 0.55$ | $11.25 \pm 0.45$ | 11.43                  |
|                    | Reverse        | $1.05 \pm 0.01$ | $17.35 \pm 0.40$               | $63.8 \pm 0.50$ | $11.61 \pm 0.47$ |                        |
